# Supplementary material for: Pathology of African Swine Fever in Wild Boar Carcasses Naturally Infected with German Virus Variants
Source: MDPI journal article supplement (doi:10.3390/pathogens11111386), 2022-11-20
Supplement: s1 [file s1]

# Histopathology

Table S2. Summary list of histopathological changes and immunohistochemistry results

|                        |                                  |                                       | No. |     |     |     |     |     |     |     |     |     |     |     |    |    |    |    |
|------------------------|----------------------------------|---------------------------------------|-----|-----|-----|-----|-----|-----|-----|-----|-----|-----|-----|-----|----|----|----|----|
| Organ                  | Microscopic finding              | Annotations                           | 1   | 2   | 3   | 4   | 5   | 6   | 7   | 8   | 9   | 10  | 11  | 12  | 13 | 14 | 15 | 16 |
| District               |                                  |                                       | LOS | MOL | MOL | MOL | MOL | MOL | SN | SN | SN | SN |
| Virus variant          |                                  |                                       | II  | III | III | III | III | III | IV | IV | IV | IV |
| Lymph node (popliteal) | Lymphoid depletion               |                                       |     |     |     |     |     |     |     |     |     |     |     |     |    |    |    |    |
|                        | Congestion/hemorrhage            |                                       |     |     |     |     |     |     |     |     |     |     |     |     |    |    |    |    |
|                        | Necrosis                         | Paracortex                            |     |     |     |     |     |     |     |     |     |     |     |     |    |    |    |    |
|                        |                                  | Medullary chords                      |     |     |     |     |     |     |     |     |     |     |     |     |    |    |    |    |
|                        | Vascular thrombosis              |                                       |     |     |     |     |     |     |     |     |     |     |     |     |    |    |    |    |
|                        | Viral antigen                    |                                       | 3   | 3   | 2   | 3   | 2   | 3   | 3   | 2   | 3   | 3   | 3   | 3   | 3  | 2  | 1  | 2  |
| Spleen                 | Lymphoid depletion               |                                       |     |     |     |     |     |     |     |     |     |     |     |     |    |    |    |    |
|                        | Necrosis red pulp                |                                       |     | A   | A   | A   | A   | A   | A   | A   | A   | A   |     | A   | A  | A  |    |    |
|                        | Congestion/hemorrhage            |                                       |     |     |     |     |     |     |     |     | A   |     |     | A   |    | A  |    |    |
|                        | Viral antigen                    |                                       | 3   | 2   | 1   | 2   | 0   | 3   | 2   | 1   | 3   | 2   | 2   | 2   | 2  | 3  | 1  | 2  |
| Lung (cranial lobe)    | Alveolar edema                   |                                       |     |     | A   |     |     |     |     |     |     |     |     |     |    |    |    |    |
|                        | Hemorrhage                       |                                       |     |     | A   |     |     |     |     |     |     |     |     |     |    |    |    | A  |
|                        | Bronchopneumonia                 | Fibrino-suppurative, necrotizing      |     |     | A   |     |     |     |     |     |     |     |     |     |    |    |    | A  |
|                        | (broncho)-interstitial pneumonia | fibrino-necrotizing                   |     |     | A   |     |     |     |     |     |     |     |     |     |    |    |    | A  |
|                        | Viral antigen                    |                                       | 3   | 2   | 2   | 2   | 1   | 3   | 2   | 2   | 3   | 3   | 2   | 3   | 3  | 1  | 1  | 3  |
| Kidney                 | Nephritis                        | Tubulointerstitial, mononuclear cells |     |     | N/A |     |     |     |     |     |     |     | A   | A   |    | A  |    | A  |
|                        | Hemorrhage                       | Cortical                              |     |     | N/A |     |     |     |     |     |     |     | A   | A   |    | A  |    | A  |

|            |                                 |                   |   |     |     |     |     |     |   |   |     |     |   |     |     |     |     |   |   |
|------------|---------------------------------|-------------------|---|-----|-----|-----|-----|-----|---|---|-----|-----|---|-----|-----|-----|-----|---|---|
|            |                                 | Medullary         |   |     | N/A |     |     |     |   |   |     |     |   | A   | A   |     | A   |   | A |
|            |                                 | Pelvic            |   |     | N/A |     |     |     |   |   |     |     |   | A   | A   |     | A   |   | A |
|            | Vascular thrombosis             |                   |   |     | N/A |     |     |     |   |   |     |     |   | A   | A   |     | A   |   | A |
|            | Viral antigen                   |                   | 2 | 2   | N/A | 3   | 0   | 3   | 2 | 1 | 2   | 3   | 1 | 1   | 2   | 2   | 1   | 2 |   |
| Liver      | Kupffer cell apoptosis/necrosis |                   |   | A   | A   | A   |     | A   | A | A | A   | A   | A | N/A |     | A   |     |   |   |
|            | Hepatocyte apoptosis/necrosis   |                   |   | A   | A   | A   |     | A   | A | A | A   | A   | A | N/A |     | A   |     |   |   |
|            | Sinusoidal infiltrates          | Neutrophils       |   | A   | A   | A   |     | A   | A | A | A   | A   | A | N/A |     | A   |     |   |   |
|            |                                 | Mononuclear cells |   | A   | A   | A   |     | A   | A | A | A   | A   | A | N/A |     |     |     |   |   |
|            | Periportal infiltrates          | Mononuclear cells |   | A   | A   | A   |     | A   | A | A | A   | A   | A | N/A |     | A   |     |   |   |
|            |                                 | Eosinophils       |   | A   | A   | A   |     | A   | A | A | A   | A   | A | N/A |     | A   |     |   |   |
|            | Viral antigen                   |                   | 2 | 2   | 2   | 2   | 1   | 3   | 2 | 1 | 2   | 3   | 2 | N/A | 1   | 1   | 1   | 2 |   |
| Heart      | Hemorrhages                     | Endocardial       |   | N/A |     | N/A |     | N/A |   |   | N/A |     | A | N/A | N/A | N/A | N/A |   |   |
|            |                                 | Myocardial        |   |     |     |     |     |     |   |   |     |     | A | N/A |     |     |     |   |   |
|            |                                 | Epicardial        |   | N/A | N/A |     | N/A |     |   |   |     | N/A | A | N/A |     |     |     |   |   |
|            | Endocardial infiltration        | Mononuclear cells |   | N/A | N/A |     |     | N/A |   |   | N/A |     | A | N/A | N/A | N/A | N/A |   |   |
|            | Viral antigen                   |                   | 2 | 0   | 2   | 2   | 0   | 1   | 1 | 0 | 2   | 1   | 1 | N/A | 2   | 1   | 1   | 2 |   |
| Cerebellum | Meningitis                      |                   |   |     |     |     |     |     |   |   |     |     |   |     |     |     |     |   |   |
|            | Encephalitis                    |                   |   |     |     |     |     |     |   |   |     |     |   |     |     |     |     |   |   |
|            | Hemorrhage                      |                   |   |     |     |     |     |     |   |   |     |     |   |     |     |     |     |   |   |
|            | Viral antigen                   |                   | 1 | 3   | 1   | 2   | 0   | 1   | 1 | 0 | 3   | 3   | 1 | 1   | 0   | 0   | 0   | 1 |   |
| Cerebrum   | Meningitis                      | Mononuclear cells |   |     |     |     |     |     |   |   |     |     |   |     |     |     |     |   |   |
|            | Encephalitis                    | Mononuclear cells |   |     |     |     |     |     |   |   |     |     |   |     |     |     |     |   |   |
|            | Choroiditis                     | Mononuclear cells |   |     |     |     |     |     |   |   |     |     |   |     |     |     |     |   |   |
|            | Hemorrhage                      |                   |   |     |     |     |     |     |   |   |     |     |   |     |     |     |     |   |   |
|            | Viral antigen                   |                   | 1 | 3   | 1   | 2   | 0   | 3   | 2 | 1 | 2   | 3   | 3 | 1   | 1   | 1   | 1   | 1 |   |

|               |                       |                                          |   |   |     |   |   |   |   |   |   |   |   |   |   |   |   |   |
|---------------|-----------------------|------------------------------------------|---|---|-----|---|---|---|---|---|---|---|---|---|---|---|---|---|
|               |                       |                                          |   |   |     |   |   |   |   |   |   |   |   |   |   |   |   |   |
| Adrenal gland | Hemorrhage            | Cortical                                 |   | A | N/A |   |   | A | A | A |   | A | A | A |   | A |   | A |
|               |                       | Medullary                                |   | A | N/A |   |   | A | A | A |   | A | A | A |   | A |   | A |
|               | Sinusoidal thrombosis |                                          |   | A | N/A |   |   | A | A | A |   | A | A | A |   | A |   | A |
|               | Necrosis              | Cortical                                 |   | A | N/A |   |   | A | A | A |   | A | A | A |   | A |   | A |
|               |                       | Medullary                                |   | A | N/A |   |   | A | A | A |   | A | A | A |   | A |   | A |
|               | Adrenalitis           | Mononuclear cells mixed with neutrophils |   | A | N/A |   |   | A | A | A |   | A | A | A |   | A |   | A |
|               | Viral antigen         |                                          | 2 | 2 | N/A | 2 | 1 | 3 | 2 | 2 | 3 | 2 | 2 | 2 | 2 | 2 | 2 | 2 |

Histopathological changes are indicated as **present** or **not present**, A = autolysis, evaluation not possible or N/A = not available. The viral antigen amount was determined on a semiquantitative scale: (+) =  $\leq 3$  positive cells; (++) = 4-15 positive cells; (+++) =  $\geq 16$  positive cells.
