# Supplementary material for: Pathology of African Swine Fever in Wild Boar Carcasses Naturally Infected with German Virus Variants
Source: MDPI journal article supplement (doi:10.3390/pathogens11111386), 2022-11-20
Supplement: s1 [file s1]

# Gross pathology

Table S3. Summary list of gross lesions scored on a semiquantitative scale

|                        |                         |                 | No. |     |     |     |     |     |     |     |     |     |     |     |    |     |    |     |   |
|------------------------|-------------------------|-----------------|-----|-----|-----|-----|-----|-----|-----|-----|-----|-----|-----|-----|----|-----|----|-----|---|
| Organ                  | Macroscopic finding     |                 | 1   | 2   | 3   | 4   | 5   | 6   | 7   | 8   | 9   | 10  | 11  | 12  | 13 | 14  | 15 | 16  |   |
| District               |                         |                 | LOS | MOL | MOL | MOL | MOL | MOL | SN | SN  | SN | SN  |   |
| Lymph node (popliteal) | Enlargement             |                 | 0   | 0   | 0   | 0   | 0   | 0   | 0   | 0   | 0   | 0   | 0   | 1   | 0  | 0   | 2  | 1   |   |
|                        | Hemorrhage              |                 | 3   | 0   | 2   | 3   | 2   | 2   | 2   | 2   | 2   | 2   | 2   | 2   | 2  | 0   | 3  | 2   |   |
| Lung                   | Alveolar edema          |                 | 2   | 3   | 0   | 0   | 1   | 3   | 2   | 3   | 3   | 0   | 2   | 1   | 3  | 3   | 2  | 2   |   |
|                        | Hemorrhage              |                 | 0   | 0   | 0   | 3   | 3   | 3   | 0   | 3   | 3   | 0   | 0   | N/A | 3  | 0   | 3  | 0   |   |
|                        | Retraction              |                 | 1   | 2   | 2   | 1   | 2   | 2   | 1   | 1   | 2   | 0   | 1   | N/A | 1  | 1   | 1  | 2   |   |
|                        | Consolidation           |                 | 3   | 3   | 1   | 2   | 3   | 1   | 2   | 3   | 3   | 1   | 2   | N/A | 3  | A   | 3  | 1   |   |
|                        | Pleuropneumonia         |                 | 3   | 0   | 0   | 0   | 0   | 0   | 0   | 3   | 0   | 0   | 0   | N/A | 3  | 0   | 0  | 3   |   |
| Kidney                 | Hemorrhage              | Size            | 2   | 1   | 3   | 2   | 2   | 1   | 3   | 2   | 2   | 1   | 0   | 2   | 2  | 0   | 2  | 3   |   |
|                        |                         | *Distribution   | 4   | 1   | 4   | 3   | 3   | 3   | 4   | 3   | 3   | 3   | 0   | 3   | 4  | 0   | 3  | 3   |   |
|                        | Pelvic dilation         |                 | 0   | 1   | 3   | 1   | 0   | 0   | 3   | 3   | 0   | 1   | 1   | 3   | 3  | 3   | 3  | 1   |   |
|                        | Pelvic hemorrhage       |                 | 0   | 1   | 3   | 1   | 1   | 0   | 0   | 0   | 3   | 3   | 0   | 0   | 3  | 0   | 0  | 0   |   |
| Liver                  | Congestion              |                 | 3   | 1   | A   | 1   | 3   | 1   | 1   | 0   | 2   | 1   | A   | A   | 1  | 1   | 1  | 1   |   |
|                        | Gall bladder wall edema |                 | 0   | 0   | A   | 0   | 0   | 0   | 0   | 0   | 0   | 0   | 0   | A   | 0  | 0   | 1  | N/A |   |
| GIT                    | Hemorrhages             | Stomach         | 2   | 1   | N/A | N/A | 3   | N/A | 3   | 1   | 1   | 1   | 0   | 2   | 2  | N/A | 1  | 0   |   |
|                        |                         | Small intestine | A   | A   | A   | A   | 1   | A   | 0   | 0   | 1   | 0   | 0   | 0   | 0  | A   | 1  | 0   |   |
|                        |                         | Large intestine | A   | A   | 3   | A   | 1   | A   | 0   | 1   | 1   | 1   | 1   | 1   | 1  | 1   | A  | 1   | 0 |
| Urinary bladder        | Hemorrhages             |                 | 0   | 0   | 0   | 0   | 3   | 0   | 0   | 1   | 2   | 2   | 0   | 0   | 3  | 1   | 3  | 0   |   |
| Bone marrow            | Hemorrhages             |                 | 0   | 0   | 0   | 3   | 3   | 0   | 3   | 3   | 3   | 3   | 3   | 3   | 3  | 2   | 3  | 3   |   |
| Heart                  | hemorrhages             | Endocardial     | 0   | 0   | 3   | 3   | 3   | 0   | 3   | 3   | 0   | 3   | 0   | 0   | 0  | 0   | 0  | 0   |   |
|                        |                         | Myocardial      | 0   | 0   | 3   | 0   | 3   | 3   | 0   | 3   | 0   | 0   | 0   | 0   | 0  | 0   | 0  | 3   | 0 |
|                        |                         | Epicardial      | 0   | 0   | 3   | 3   | 3   | 3   | 3   | 3   | 0   | 2   | 3   | 0   | 0  | 0   | 0  | 3   | 0 |

Lesions were scored on a semiquantitative scale; score 0 = normal, score 1 = mild, score 2 = moderate and score 3 = severe. \*The distributional pattern of kidney hemorrhages was determined from 0 to 4; 0 = normal, 1 = focal, 2 = oligofocal, 3 = multifocal, 4 = diffuse. A = autolysis, evaluation not possible; N/A = not available.
