# Supplementary material for: Pathology of African Swine Fever in Wild Boar Carcasses Naturally Infected with German Virus Variants
Source: Pathogens. 2022 Nov 20;11(11):1386. doi: 10.3390/pathogens11111386 (PMC9699169; doi:10.3390/pathogens11111386)
Supplement: Supplementary file 1 [file pathogens-11-01386-s001.zip]

Archive with 11 entries (11 files):
- Fig S1.tif
- Fig S2.tif
- Fig S3.tif
- Fig S4.tif
- Fig S5.tif
- Fig S6.tif
- Supplemental figure legends.pdf
- Supplemental material 1.pdf
- Table S1.xlsx
- Table S2.pdf
- Table S3.pdf
