# Supplementary material for: Pathology of African Swine Fever in Wild Boar Carcasses Naturally Infected with German Virus Variants
Source: Pathogens. 2022 Nov 20;11(11):1386. doi: 10.3390/pathogens11111386 (PMC9699169; doi:10.3390/pathogens11111386)
Supplement: Supplementary file 1 [file pathogens-11-01386-s001.zip › Table S1.xlsx]

## Sheet: Ergebnisse
No.	District	Spleen	Lung	Liver	Kidney	Popliteal lymph node	Brain	EDTA blood
1	LOS	10230	70470	19010	16400	16450	443.8	877200
2	LOS	18860	748.8	4942	3257	27840	3007	277900
3	LOS	1991	1182	2137	N/A	3191	20.34	1245
4	LOS	44560	26410	41390	50020	11460	201.9	480200
5	LOS	1077	744.7	564.3	623.6	6374	40.5	210600
6	LOS	78730	52050	30990	5312	15130	49.76	645500
7	LOS	9664	4888	4228	8407	14410	54.73	84280
8	MOL	1657	2798	306.4	84.79	1977	38.63	82.56
9	MOL	21230	31440	27110	910.4	13480	1512	24490
10	MOL	9527	18710	142300	8769	33540	169.8	356200
11	MOL	7649	862.7	5268	4412	10990	115.2	37220
12	MOL	2432	20220	2570	8032	14550	329.1	4905
13	SN	1445	13820	1982	3034	5053	25.5	26900
14	SN	856.4	9626	6287	4429	3995	72.6	130200
15	SN	1568	459.7	1713	194.6	531	32.95	21720
16	SN	331.4	1690	2682	985.9	9138	35.5	105400
